# Supplementary material for: Determination of Complex Formation between Drosophila Nrf2 and GATA4 Factors at Selective Chromatin Loci Demonstrates Transcription Coactivation
Source: MDPI journal article supplement (doi:10.3390/cells12060938), 2023-03-19
Supplement: s1 [file s1]

## **Supplementary Material**

### **Determination of Complex Formation between Drosophila Nrf2 and GATA4 Factors at Selective Chromatin Loci Demonstrates Transcription Coactivation**

Emma Neidviecky <sup>1</sup>, Huai Deng<sup>1,2</sup>

Figure S1

Figure S2

Figure S3

Table S1

**Figure S1**

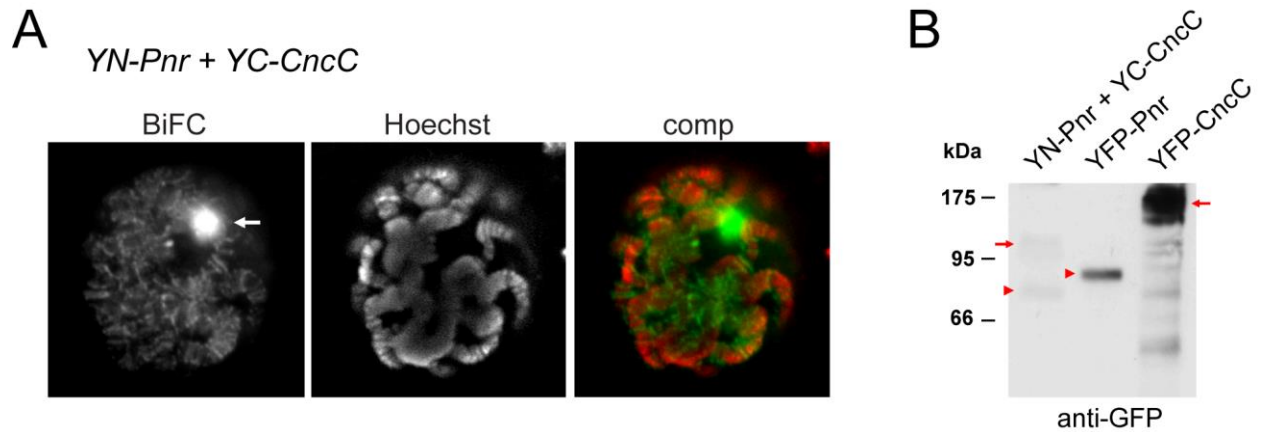

**Figure S1. CncC-Pnr BiFC assay in salivary gland cells**

(A) *CncC-Pnr BiFC assay in salivary gland cells.* YN-Pnr and YC-CncC fusion proteins were co-expressed using the *Sgs3-GAL4* driver. Salivary glands were dissected and stained with Hoechst (red). CncC-Pnr BiFC signals (green) were detected both on the polytene chromosome and in a concentrated region (arrow) in the nucleoplasm in less than 10% of cells.

(B) *Expression levels of fusion proteins.* This is the short exposure result for the western blotting shown in Figure 1C. Extracts of salivary glands that expressed CncC-Pnr BiFC (YN-Pnr + YC-CncC), YFP-CncC, or YFP-Pnr were probed using antibodies against GFP which recognize both the YN and YC fragments of the BiFC fusion proteins. Marker sizes (kDa) are indicated on the left. CncC and Pnr fusion proteins are indicated by arrows and arrowheads, respectively. At higher exposure (Figure 1C), the YFP-CncC band (indicated by the right arrow) becomes indistinguishable from other lower bands.

**Figure S2**

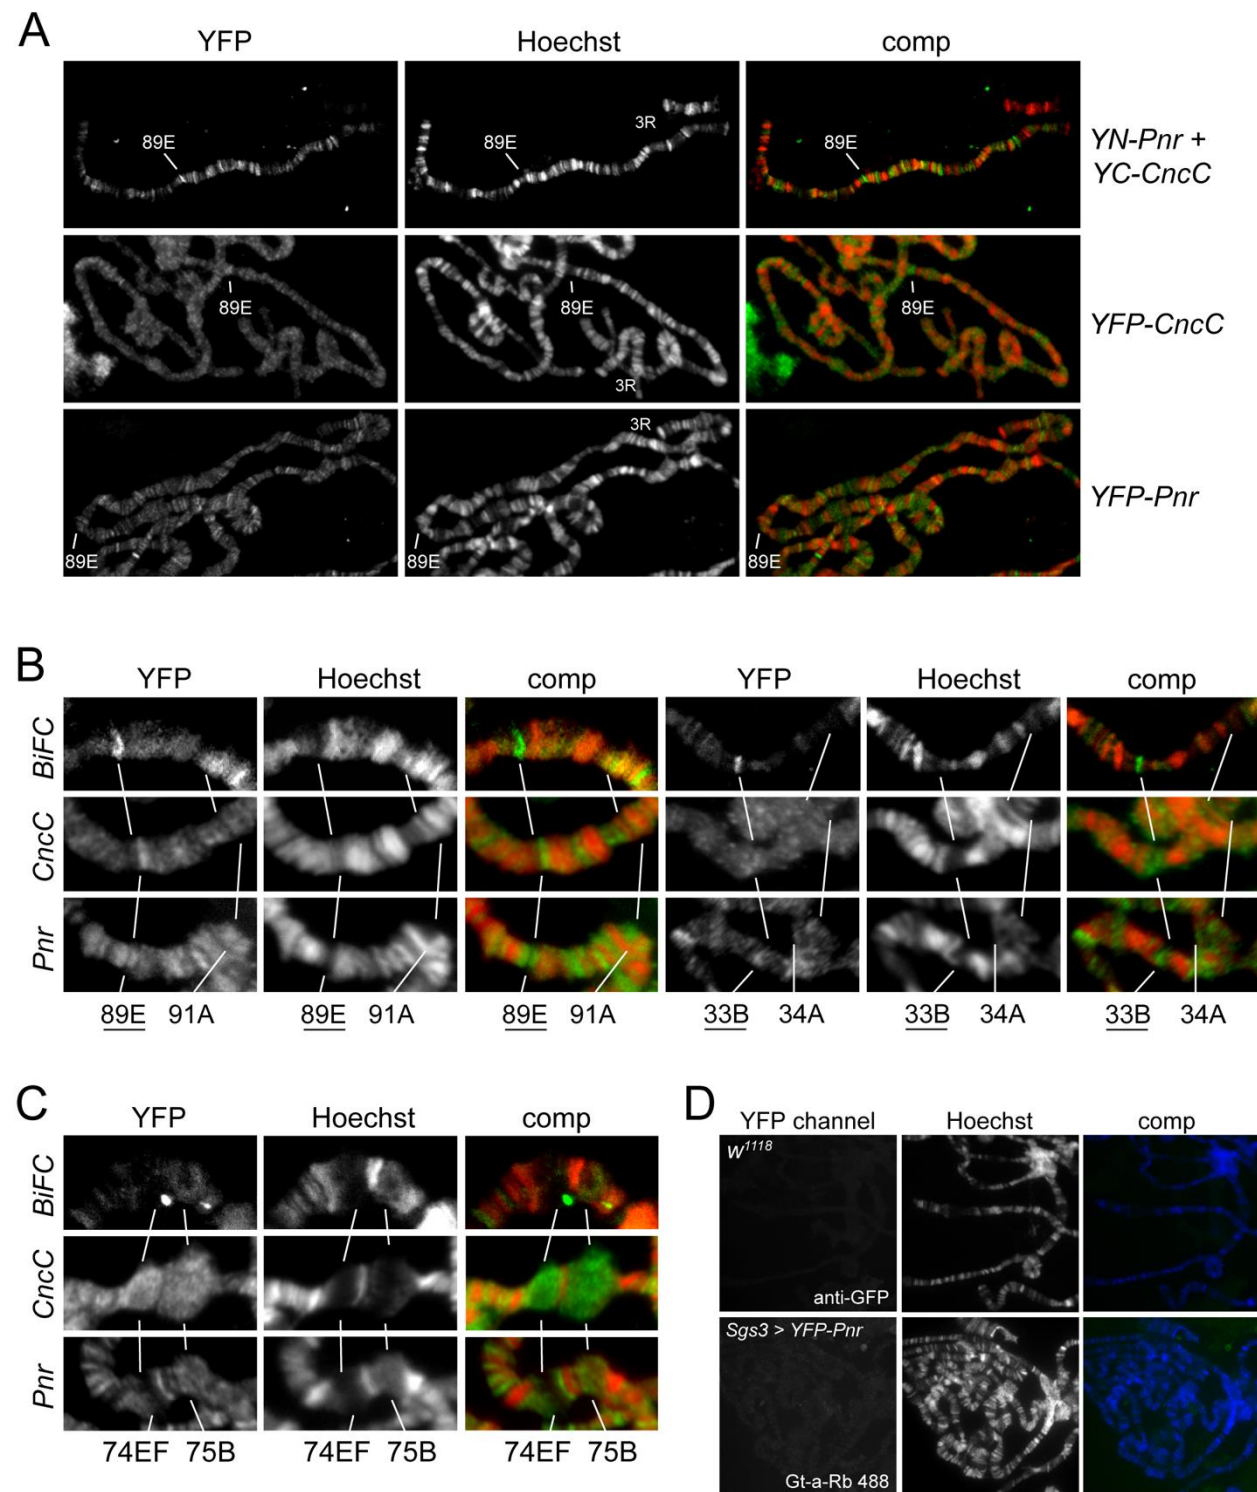

## Figure S2. Comparison of CncC-Pnr BiFC and individual proteins at chromatin loci

(A) *Comparison of the bindings of CncC-Pnr BiFC, YFP-CncC, and YFP-Pnr bindings at the 89E locus.* The fusions proteins indicated on the right were expressed in salivary glands using the *Sgs3-GAL4* driver. CncC-Pnr BiFC fluorescence (green) was visualized intrinsically and YFP-CncC and YFP-Pnr were visualized through anti-GFP immunostaining (green). Polytene chromosome spreads were counterstained with Hoechst (red). Chromosome arm 3R and the 89E locus on this chromosome are indicated. Fragments of the 89E region are aligned and compared in Figure 2B.

(B) *Comparison of CncC-Pnr BiFC, YFP-CncC, and YFP-Pnr bindings at selected loci.* Fragments of polytene chromosome spreads were aligned and compared at loci indicated below. Loci that are highly occupied by CncC-Pnr BiFC complexes are underlined. Adjacent control loci 91A and 34A are highly occupied by YFP-Pnr.

(C) *Comparison of CncC-Pnr BiFC, YFP-CncC, and YFP-Pnr bindings at CncC-targeting sites.* Intrinsic CncC-Pnr BiFC fluorescence signals (green) were imaged at ecdysone-response puffs (74EF and 75B) that are highly occupied by CncC. YFP-CncC and YFP-Pnr bindings were visualized by anti-GFP immunostaining (green).

(D) *Specificity of antibodies for immunostaining.* Upper panel: polytene chromosome spreads from wildtype (*w<sup>1118</sup>*) salivary glands were stained with anti-GFP followed by Goat anti-rabbit Alexa Fluor 488 secondary antibody. Lower panel: polytene chromosome spreads from salivary glands expressing YFP-Pnr were stained with Goat anti-rabbit Alexa Fluor 488 secondary antibody only. All polytene chromosomes were co-stained using Hoechst (blue). No specific signals were detected in the YFP channel, indicating that the primary and secondary antibodies have no non-specific recognition on the polytene chromosome in our immunofluorescence assays (Figures 2A, 2B, S2A, S2B).

**Figure S3**

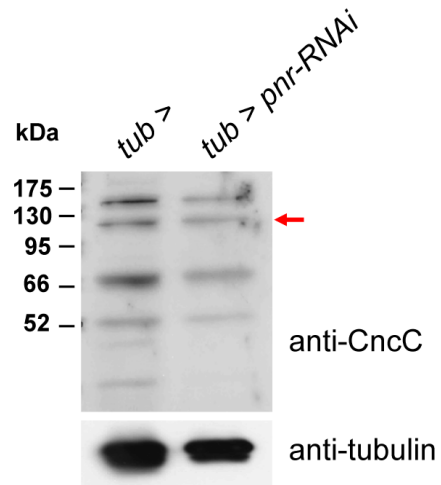

**Figure S3. CncC protein levels in the pnr mutant.**

Extracts of L2 larvae that express *pnr-RNAi* using *tub-GAL4* (*tub > pnr-RNAi*) and control larvae (*tub-GAL4* only) were analyzed by western blotting using antibodies against CncC and tubulin (loading control). Marker sizes (kDa) are indicated on the left. Endogenous CncC proteins with predicted size are indicated by arrow. Depletion of Pnr by RNAi had no significant effects on the protein level of CncC.

**Table S1. Primer sequences used to measure the transcript levels by RT-qPCR**

| gene           | 5'-primer                | 3'-primer                |
|----------------|--------------------------|--------------------------|
| <i>Rp49</i>    | CGGATCGATATGCTAAGCTGT    | GCGCTTGTTTCGATCCGTA      |
| <i>cncC</i>    | TGACTCCGCCCAGGATTA       | TGTTGTAGCTGAAGTCGTAGGG   |
| <i>pnr</i>     | GGAACAGGCTCCACTTTGG      | GAGCGAGGGTTTGAGATCAT     |
| <i>Glut3</i>   | GACTGATGGTGCGACTCTTG     | GCATAGAGCATCGGAACACTT    |
| <i>Actn3</i>   | CGAAGAAACAGCCAAAATCG     | GGACGCCACTTTGTATTGAAC    |
| <i>Irc</i>     | GGGAAATCGAGAGGGTCACT     | CGGAATTGGGAAACATCTGA     |
| <i>Pxd</i>     | AAGCTCACTGGATTTACTCCTGA  | GCACAGCAAACGAGCCATA      |
| <i>Dad</i>     | AGCATGTGCCTACGTGACCT     | GCCGTTCTCCAGACTCAATG     |
| <i>Ns1</i>     | AGGCAAGAGCTCCATCATAAAC   | CTCCGCTGGTAAATACGATTCC   |
| <i>dKeap1</i>  | CAAGGAGTCGGAGATGTCTG     | GTAGAGGATGCGTGACATGG     |
| <i>kuk</i>     | GTCGATATGGAACCGCTACAA    | CTACCACGGAAACTGAAGAGAC   |
| <i>GckIII</i>  | ATCTGGAGGAGGCCGAAG       | GCGACAGCACCATGATCTC      |
| <i>cal1</i>    | AGGAAACACTGGAGGCAATG     | CGAACTCGGCCACATCTATTT    |
| <i>cher</i>    | CAAGGTGGTGTCCAAGGGTA     | TGCCCACGTACAGGATGTT      |
| <i>Or33b</i>   | TGCGCAGCACCATGAATA       | CCGCAAAGAAGAGAATGTTGAC   |
| <i>Or33c</i>   | GAATGGGTCAACTGGGATACTT   | TGGAATCGCACCAAGAGTTTA    |
| <i>escl</i>    | CAGACCCAGATACCGATGAAAG   | TGGTGCTTAACCGGATTGAATA   |
| <i>Ada1-2</i>  | GAAGTGAATACGGCCAACCTTATG | CAGTCCTTGAGGGTGATTACTG   |
| <i>Ada1-1</i>  | GAAGTGAATACGGCCAACCTTATG | CAGTCCTTGAGGGTGATTACTG   |
| <i>Nfs1</i>    | GACAGGTGCGATTCAACATAAAG  | GGAGCATAGCGTCCAATACA     |
| <i>Wdr81</i>   | GAACGACTGCATCACTGGAT     | GGTGCTGATCCACAAGAGTAAG   |
| <i>dmGlut</i>  | TGCTGGTGGTCAAGAAGAAC     | CTCCTCGGACCATTGAAATC     |
| <i>Tom70</i>   | CAGTACAAAGTGGAGGCTCTG    | AGTTGGGATCAGCATAGTCATTAG |
| <i>Plzf</i>    | CGAAGGAAGCAACGGAGAT      | CACTTTGCTGCTGGACTTTAC    |
| <i>Chd1</i>    | AAGAGGAGGACTATAGACCCAAG  | GTTTGCTGCGAGAGGTAGTT     |
| <i>Cpr</i>     | GACCCACTACCTGGAAATTACG   | TGGGCGACAGGATTTGATG      |
| <i>CtrlA</i>   | GATTTGCAGGCAAGTCACG      | CTTCAGTCCCTCGTACATTAGG   |
| <i>Cyp4p1</i>  | GCACTCGATGTGGTTCATAGA    | GTGTCCACCTCCTCACAAAT     |
| <i>Cyp6v1</i>  | GGGCGCCTTATCGCTATTT      | GTACAGATCACACACGTCTTG    |
| <i>Cyt-b5</i>  | CGTAACTTCGCTCGAGTTCTTA   | TTGTCCTTTCGCTCTCCAC      |
| <i>dl</i>      | CGAGCGGTGTTCACTAACTT     | GTGAATCGACCTTCTGCTC      |
| <i>Egfr</i>    | GGATCAGTGCAACGAGGAC      | CCTCACATGGACGCACTC       |
| <i>Ets98B</i>  | AATCCTTCATCGGAGGCTTG     | AGTGCAGCTCCAAATCGG       |
| <i>ewg</i>     | TATTCTACGGGACGAGGGAAG    | CAAAGGTGGGCAGCAGAT       |
| <i>foxo</i>    | AGCAGCAGTCGCCCTAC        | CCACGTTGCTGTACGTGTTT     |
| <i>fra</i>     | TGTGTGTCCACCATGAAAGT     | AGTGAAGTACCGAGCCA        |
| <i>Atx2</i>    | GGCAACGGCAATTCTGTG       | CTGGTACTGGCGCATCTG       |
| <i>bbc</i>     | AATTGTGTGCGGTCTGCT       | CATGATGTACACCGATGCGT     |
| <i>bdg</i>     | ATCAGGAGGCGGCACAA        | CATCGCAACTGTAGCTTTGGT    |
| <i>bsf</i>     | TCAGCAGGGAGACATTGAAG     | ACAGGAGAGTGGTGTAGGT      |
| <i>Hem</i>     | TCCTGGGACCTAAGGCAATA     | GCTGCATTACCTGGCTGTAT     |
| <i>Hsc70-3</i> | GCATATTACTGGCCGTCGT      | GGTGAAAGCGACGTAGGAG      |
| <i>ifc</i>     | TTTGGACACAGCAGACCTATG    | CAGGCACACCCACAGAAA       |
